# Supplementary material for: Land Use Land/Cover Change Reduces Woody Plant Diversity and Carbon Stocks in a Lowland Coastal Forest Ecosystem, Tanzania
Source: MDPI journal article supplement (doi:10.3390/su14148551), 2022-07-13
Supplement: s1 [file s1]

**Table S1:** List of tree species identified in the study area at lowland coastal forest ecosystem, Tanzania.

| s/n | Botanical name               | Family         | Common name    | s/n | Botanical name                  | Family        | Common name      |
|-----|------------------------------|----------------|----------------|-----|---------------------------------|---------------|------------------|
| 1   | <i>Acacia mellifera</i>      | Fabaceae       | Msasa          | 48  | <i>Mimusops angustilolia</i>    | Sapotaceae    | Mgama            |
| 2   | <i>Afzelia quanzensis</i>    | Fabaceae       | Mkomba         | 49  | <i>Mimusops kummel</i>          | Sapotaceae    | Mgama            |
| 3   | <i>Albizia anthelmintica</i> | Fabaceae       | Mfuleta        | 50  | <i>Mimusops obovata</i>         | Sapotaceae    | Msama            |
| 4   | <i>Albizia gummifera</i>     | Fabaceae       | Mkenge         | 51  | <i>Mimusops obtusifolia</i>     | Sapotaceae    | Msama            |
| 5   | <i>Albizia harveyi</i>       | Fabaceae       | Mkongowe       | 52  | <i>Mystroxyloa aethiopicum</i>  | Celastraceae  | Mlimbolimbo      |
| 6   | <i>Balanites aegyptiaca</i>  | Zygophyllaceae | Mkonga         | 53  | <i>Ochna schweinfurthiana</i>   | Ochnaceae     | Mfyonze fyonze   |
| 7   | <i>Berchemia discolor</i>    | Rhamnaceae     | Mgandugandu    | 54  | <i>Ozoroa insignis</i>          | Anacardiaceae | Mkuruchuna       |
| 8   | <i>Blighia welwitschii</i>   | Sapindaceae    | Mzindanguruwe  | 55  | <i>Pauridiantha paucinervis</i> | Rubiaceae     | Kahawa pori      |
| 9   | <i>Brachystegia bussei</i>   | Fabaceae       | Mtondoro       | 56  | <i>Philenoptera violacea</i>    | Fabaceae      | Mtumbili         |
| 10  | <i>Bridelia cathartica</i>   | Phyllanthaceae | Kikundilikwima | 57  | <i>Psidium guajava</i>          | Myrtaceae     | Mpera            |
| 11  | <i>Carpodiptera africana</i> | Malvaceae      | Mlanga         | 58  | <i>Psorospermum febrifugum</i>  | Hypericaceae  | Mfyonzefyonze    |
| 12  | <i>Catunaregam spinosa</i>   | Rubiaceae      | Mtutuma        | 59  | <i>Pteleopsis myrtifolia</i>    | Combretaceae  | Mgoji            |
| 13  | <i>Catunaregam spinosa</i>   | Rubiaceae      | Mtutuma        | 60  | <i>Rothmannia manganjae</i>     | Rubiaceae     | Mhuuzi           |
| 14  | <i>Citrus limon</i>          | Rutaceae       | Mlimau         | 61  | <i>Sclerocarya birrea</i>       | Anacardiaceae | Mn'ongo (marula) |
| 15  | <i>Combretum collinum</i>    | Combretaceae   | Mlama mwekundu | 62  | <i>Sclerocarya birrea</i>       | Anacardiaceae | Mng'ongo, Marula |
| 16  | <i>Combretum fragrans</i>    | Combretaceae   | Mlama ng'ombe  | 63  | <i>Scorodophloeus fischeri</i>  | Fabaceae      | Mhande           |
| 17  | <i>Combretum hereroense</i>  | Combretaceae   | Mlukwe         | 64  | <i>Senegalia goetzei</i>        | Fabaceae      | Msasa            |
| 18  | <i>Combretum imberbe</i>     | Combretaceae   | Mwanga         | 65  | <i>Senegalia nigrescens</i>     | Fabaceae      | Mkambala         |
| 19  | <i>Combretum molle</i>       | Combretaceae   | Mlama mweusi   | 66  | <i>Senegalia polyacantha</i>    | Fabaceae      | Mgunga           |
| 20  | <i>Combretum zeyheri</i>     | Combretaceae   | Mlamang'ombe   | 67  | <i>Sericanthe odoratissima</i>  | Rubiaceae     | Kahawa pori      |
| 21  | <i>Commiphora africana</i>   | Burseraceae    | Ntwintwi       | 68  | <i>Spirostachys africana</i>    | Euphorbiaceae | Msalaka          |
| 22  | <i>Commiphora ugogensis</i>  | Burseraceae    | Mkongolo       | 69  | <i>Steganotaenia araliacea</i>  | Apiaceae      | Mnyongampembe    |
| 23  | <i>Craibia brevicaudata</i>  | Fabaceae       | Mhande         | 70  | <i>Sterculia appendiculata</i>  | Malvaceae     | Mfunne           |
| 24  | <i>Dalbergia elata</i>       | Fabaceae       | Msangazi       | 71  | <i>Strychnos innocua</i>        | Loganiaceae   | Mtongatonga      |
| 25  | <i>Dalbergia melanoxylon</i> | Fabaceae       | Mpingo         | 72  | <i>Suregada lithoxyla</i>       | Euphorbiaceae | Mdimu-pori       |
| 26  | <i>Dichrostachys cinerea</i> | Fabaceae       | Mkulagembe     | 73  | <i>Suregada zanzibariensis</i>  | Euphorbiaceae | Mdimu pori       |

|    |                                    |                |             |    |                               |              |             |
|----|------------------------------------|----------------|-------------|----|-------------------------------|--------------|-------------|
| 27 | <i>Diospyros consolatae</i>        | Ebenaceae      | Mhambarachi | 74 | <i>Tamarandus indica</i>      | Fabaceae     | Mkwaju      |
| 28 | <i>Diospyros kirkii</i>            | Ebenaceae      | Mkuru       | 75 | <i>Teclea nobilis</i>         | Rutaceae     | Mhale       |
| 29 | <i>Diospyros mespiliformis</i>     | Ebenaceae      | Mfisha      | 76 | <i>Terminalia mollis</i>      | Combretaceae | Mtanga      |
| 30 | <i>Diospyros squarrosa</i>         | Ebenaceae      | Msungura    | 77 | <i>Terminalia sericea</i>     | Combretaceae | Mtanga      |
| 31 | <i>Dobera loranthifolia</i>        | Salvadoraceae  | Msiga       | 78 | <i>Turraea robusta</i>        | Meliaceae    | Mghwemono   |
| 32 | <i>Dombeya rotundifolia</i>        | Malvaceae      | Mnwati      | 79 | <i>Vachellia hockii</i>       | Fabaceae     | Mgunga      |
| 33 | <i>Drypetes natalensis</i>         | Euphorbiaceae  | Mdadarika   | 80 | <i>Vachellia nilotica</i>     | Fabaceae     | Mkongoe     |
| 34 | <i>Drypetes natalensis</i>         | Euphorbiaceae  | Mdadarika   | 81 | <i>Vachellia nilotica</i>     | Fabaceae     | Mkongoe     |
| 35 | <i>Ehretia amoena</i>              | Ehretiaceae    | Mkirika     | 82 | <i>Vachellia robusta</i>      | Fabaceae     | Mkongowe    |
| 36 | <i>Euphorbia candelabrum</i>       | Euphorbiaceae  | Mbamba      | 83 | <i>Vachellia xanthophloea</i> | Fabaceae     | Mluzigunga  |
| 37 | <i>Euphorbia tirucalli</i>         | Euphorbiaceae  | Mnyaa       | 84 | <i>Vepris lanceolata</i>      | Rutaceae     | Mndizi      |
| 38 | <i>Grewia bicolor</i>              | Malvaceae      | Mkole       | 85 | <i>Vepris simplicifolia</i>   | Rutaceae     | Mndizi      |
| 39 | <i>Grewia goetzeana</i>            | Malvaceae      | Mkole       | 86 | <i>Ximenia caffra</i>         | Ximeniaceae  | Mtundwi     |
| 40 | <i>Haplocoelum foliolosum</i>      | Rutaceae       | Mhale       | 87 | <i>Zanthoxylum chalybeum</i>  | Rutaceae     | Mlungulungu |
| 41 | <i>Haplocoelum inoploeum</i>       | Sapindaceae    | Mhale       |    |                               |              |             |
| 42 | <i>Hymenocardia ulmoides</i>       | Phyllanthaceae | Mnondo      |    |                               |              |             |
| 43 | <i>Lannea stuhlmannii</i>          | Anacardiaceae  | Muumbu      |    |                               |              |             |
| 44 | <i>Lecaniodiscus fraxinifolius</i> | Sapindaceae    | Mbwewe      |    |                               |              |             |
| 45 | <i>Manilkara discolor</i>          | Sapotaceae     | Msagati     |    |                               |              |             |
| 46 | <i>Manilkara sansibarensis</i>     | Sapotaceae     | Msezi       |    |                               |              |             |
| 47 | <i>Markhamia lutea</i>             | Bignoniaceae   | Mtarawanda  |    |                               |              |             |

**Table S2:** Herbaceous species composition and dominance based on Important Value Index (IVI) of the grassland land-use types in lowland coastal forest of Wami mbiki –Saadani (WMS) ecosystem, Tanzania (RF = Relative Frequency; RD = Relative Density; Rdo = Relative Dominance; IVI = Importance Value Index, N; =number of species in a sampling plot)

| <i>BOTANICAL NAME</i>                     | Growth form | <i>Family</i>         | RF    | RD    | Rdo   | IVI   | N |
|-------------------------------------------|-------------|-----------------------|-------|-------|-------|-------|---|
| <i>Commelina benghalensis</i>             | Herb        | <i>Commelinaceae</i>  | 1.000 | 5.128 | 5.128 | 3.75  | 2 |
| <i>Cymbopogon plurrinotus</i>             | Grass       | <i>Poaceae</i>        | 0.01  | 5.13  | 5.13  | 3.75  | 7 |
| <i>Cyperus kyilingia</i>                  | Grass       | <i>Cyperaceae</i>     | 0.01  | 17.95 | 17.95 | 11.97 | 1 |
| <i>Cyperus rotundus</i>                   | Grass       | <i>Cyperaceae</i>     | 0.00  | 2.56  | 2.56  | 1.71  | 5 |
| <i>Eragrostic pilosa</i>                  | Grass       | <i>Poaceae</i>        | 0.00  | 12.82 | 12.82 | 8.55  | 1 |
| <i>Gilgichloa indurata</i>                | Grass       | <i>Gramineae</i>      | 0.00  | 2.56  | 2.56  | 1.71  | 5 |
| <i>Hyparrhenia cymbaria</i>               | Grass       | <i>Panicoidae</i>     | 0.00  | 5.13  | 5.13  | 3.42  | 1 |
| <i>Hyparrhenia hirta</i>                  | Grass       | <i>Panicoidae</i>     | 0.00  | 2.56  | 2.56  | 1.71  | 7 |
| <i>Hyparrhenia rufa</i>                   | Grass       | <i>Poaceae</i>        | 0.01  | 17.95 | 17.95 | 11.97 | 1 |
| <i>Ipomea aquatica</i>                    | Grass       | <i>Convolvulaceae</i> | 0.00  | 2.56  | 2.56  | 1.71  | 1 |
| <i>Perotis indica/Pennisetum setaceum</i> | Grass       | <i>Poaceae</i>        | 0.00  | 2.56  | 2.56  | 1.71  | 1 |
| <i>Sesbania sesban</i>                    | Grass       | <i>Fabaceae</i>       | 0.00  | 2.56  | 2.56  | 1.71  | 1 |
| <i>Striga asiatica</i>                    | Herb        | <i>Orobanchaceae</i>  | 0.00  | 2.56  | 2.56  | 1.71  | 2 |
| <i>Typha capensis</i>                     | Grass       | <i>Typhaceae</i>      | 0.00  | 5.13  | 5.13  | 3.42  | 1 |
| <i>Vigna sinensis /Vigna textilis</i>     | Grass       | <i>Papilionoideae</i> | 0.00  | 2.56  | 2.56  | 1.71  | 1 |

**Table S 3:** Plant species composition and dominance based on Important Value Index (IVI) of the three different land-use types in lowland coastal forest of Wami mbiki –Saadani (WMS) ecosystem, Tanzania (RF = Relative Frequency; RD = Relative Density; Rdo = Relative Dominance; IVI = Importance Value Index, BAN=Basal area, N; =number of species in a sampling plot)

| Species name                 | FOREST      |             |              |             | BUSHLAND     |              |             |             | AGRICULTURE |      |      |      | BA          | N  |
|------------------------------|-------------|-------------|--------------|-------------|--------------|--------------|-------------|-------------|-------------|------|------|------|-------------|----|
|                              | Rdo         | RF          | RD           | IVI         | Rdo          | RF           | RD          | IVI         | Rdo         | RF   | RD   | IVI  |             |    |
| <i>Acacia mellifera</i>      | 0.00        | 0.00        | <b>1.58</b>  | <b>0.53</b> | <b>1.51</b>  | <b>1.51</b>  | 0.00        | <b>1.01</b> | 0.00        | 0.00 | 0.00 | 0.00 | <b>0.01</b> | 3  |
| <i>Azela quanzensis</i>      | <b>1.19</b> | <b>1.19</b> | 0.00         | <b>0.79</b> | 0.00         | 0.00         | <b>1.19</b> | <b>0.40</b> | 0.00        | 0.00 | 0.00 | 0.00 | <b>0.08</b> | 5  |
| <i>Albizia anthelmintica</i> | <b>3.56</b> | <b>3.56</b> | 0.00         | <b>2.37</b> | 0.00         | 0.00         | <b>3.56</b> | <b>1.19</b> | 0.00        | 0.00 | 0.00 | 0.00 | <b>0.06</b> | 15 |
| <i>Albizia gummifera</i>     | <b>0.24</b> | <b>0.24</b> | 0.00         | <b>0.16</b> | 0.00         | 0.00         | <b>0.24</b> | <b>0.08</b> | 0.00        | 0.00 | 0.00 | 0.00 | <b>0.05</b> | 1  |
| <i>Albizia harveyi</i>       | 0.00        | 0.00        | <b>1.58</b>  | <b>0.53</b> | <b>6.03</b>  | <b>6.03</b>  | <b>0.00</b> | <b>4.02</b> | 0.00        | 0.00 | 0.00 | 0.00 | <b>0.01</b> | 12 |
| <i>Balanites aegyptiaca</i>  | <b>0.48</b> | <b>0.47</b> | 0.00         | <b>0.32</b> | 0.00         | 0.00         | <b>0.48</b> | <b>0.16</b> | 0.00        | 0.00 | 0.00 | 0.00 | <b>0.03</b> | 2  |
| <i>Berchemia discolor</i>    | <b>0.24</b> | <b>0.24</b> | 0.00         | <b>0.16</b> | 0.00         | 0.00         | <b>0.24</b> | <b>0.08</b> | 0.00        | 0.00 | 0.00 | 0.00 | <b>0.04</b> | 1  |
| <i>Blighia welwitschii</i>   | <b>0.24</b> | <b>0.24</b> | 0.00         | <b>0.16</b> | 0.00         | 0.00         | <b>0.24</b> | <b>0.08</b> | 0.00        | 0.00 | 0.00 | 0.00 | <b>0.01</b> | 1  |
| <i>Brachystegia bussei</i>   | <b>2.85</b> | <b>2.85</b> | 0.00         | <b>1.90</b> | 0.00         | 0.00         | <b>2.85</b> | <b>0.95</b> | 0.00        | 0.00 | 0.00 | 0.00 | <b>0.12</b> | 12 |
| <i>Bridelia cathartica</i>   | 0.00        | 0.00        | <b>2.63</b>  | <b>0.88</b> | <b>2.51</b>  | <b>2.51</b>  | 0.00        | <b>1.67</b> | 0.00        | 0.00 | 0.00 | 0.00 | 0.00        | 5  |
| <i>Carpodiptera africana</i> | <b>0.48</b> | <b>0.47</b> | 0.00         | <b>0.32</b> | 0.00         | 0.00         | <b>0.48</b> | <b>0.16</b> | 0.00        | 0.00 | 0.00 | 0.00 | <b>0.02</b> | 2  |
| <i>Catunaregam spinosa</i>   | 0.00        | 0.00        | <b>2.63</b>  | <b>0.88</b> | <b>2.51</b>  | <b>2.51</b>  | 0.00        | <b>1.67</b> | 0.00        | 0.00 | 0.00 | 0.00 | <b>0.01</b> | 5  |
| <i>Citrus limon</i>          | 0.00        | 0.00        | <b>1.05</b>  | <b>0.35</b> | <b>1.01</b>  | <b>1.01</b>  | 0.00        | <b>0.67</b> | 0.00        | 0.00 | 0.00 | 0.00 | 0.00        | 2  |
| <i>Combretum collinum</i>    | 0.00        | 0.00        | <b>7.37</b>  | <b>2.46</b> | <b>7.04</b>  | <b>7.04</b>  | 0.00        | <b>4.69</b> | 0.00        | 0.00 | 0.00 | 0.00 | <b>0.01</b> | 14 |
| <i>Combretum fragrans</i>    | <b>0.48</b> | <b>0.47</b> | <b>3.68</b>  | <b>1.54</b> | <b>3.52</b>  | <b>3.52</b>  | <b>0.48</b> | <b>2.51</b> | 0.00        | 0.00 | 0.00 | 0.00 | <b>0.01</b> | 9  |
| <i>Combretum hereroense</i>  | <b>3.33</b> | <b>3.32</b> | 0.00         | <b>2.22</b> | 0.00         | 0.00         | <b>3.33</b> | <b>1.11</b> | 0.00        | 0.00 | 0.00 | 0.00 | 0.00        | 14 |
| <i>Combretum imberbe</i>     | 0.00        | 0.00        | <b>1.58</b>  | <b>0.53</b> | <b>1.51</b>  | <b>1.51</b>  | 0.00        | <b>1.01</b> | 0.00        | 0.00 | 0.00 | 0.00 | <b>0.04</b> | 3  |
| <i>Combretum molle</i>       | 0.00        | 0.00        | <b>11.58</b> | <b>3.86</b> | <b>11.06</b> | <b>11.06</b> | 0.00        | <b>7.37</b> | 0.00        | 0.00 | 0.00 | 0.00 | <b>0.01</b> | 22 |
| <i>Combretum zeyheri</i>     | 0.00        | 0.00        | <b>0.53</b>  | <b>0.18</b> | <b>0.50</b>  | <b>0.50</b>  | 0.00        | <b>0.33</b> | 0.00        | 0.00 | 0.00 | 0.00 | <b>0.01</b> | 1  |
| <i>Commiphora africana</i>   | <b>1.43</b> | <b>1.42</b> | <b>0.53</b>  | <b>1.13</b> | <b>0.50</b>  | <b>0.50</b>  | <b>1.43</b> | <b>0.81</b> | 0.00        | 0.00 | 0.00 | 0.00 | <b>0.02</b> | 7  |
| <i>Commiphora ugogensis</i>  | <b>0.48</b> | <b>0.47</b> | 0.00         | <b>0.32</b> | 0.00         | 0.00         | <b>0.48</b> | <b>0.16</b> | 0.00        | 0.00 | 0.00 | 0.00 | 0.00        | 2  |
| <i>Craibia brevicaudata</i>  | <b>0.24</b> | <b>0.24</b> | 0.00         | <b>0.16</b> | 0.00         | 0.00         | <b>0.24</b> | <b>0.08</b> | 0.00        | 0.00 | 0.00 | 0.00 | <b>0.02</b> | 1  |
| <i>Craibia zimmermannii</i>  | <b>0.24</b> | <b>0.24</b> | 0.00         | <b>0.16</b> | 0.00         | 0.00         | <b>0.24</b> | <b>0.08</b> | 0.00        | 0.00 | 0.00 | 0.00 | 0.00        | 1  |
| <i>Dalbergia elata</i>       | 0.00        | 0.00        | <b>2.63</b>  | <b>0.88</b> | <b>2.51</b>  | <b>2.51</b>  | 0.00        | <b>1.67</b> | 0.00        | 0.00 | 0.00 | 0.00 | <b>0.05</b> | 5  |

Agriculture= Agriculture with scattered settlements

**Table S3** (Continued)

| Species name                       | FOREST       |              |             |              | BUSHLAND    |             |              |             | AGRICULTURE  |              |             |              | BA          | N  |
|------------------------------------|--------------|--------------|-------------|--------------|-------------|-------------|--------------|-------------|--------------|--------------|-------------|--------------|-------------|----|
|                                    | Rdo          | RF           | RD          | IVI          | Rdo         | RF          | RD           | IVI         | Rdo          | RF           | RD          | IVI          |             |    |
| <i>Dalbergia melanoxylon</i>       | 0.00         | 0.00         | <b>1.58</b> | <b>0.53</b>  | <b>1.51</b> | <b>1.51</b> | 0.00         | <b>1.01</b> | 0.00         | 0.00         | 0.00        | 0.00         | <b>0.01</b> | 3  |
| <i>Deinbollia borbonica</i>        | 0.00         | 0.00         | 0.00        | 0.00         | 0.00        | 0.00        | 0.00         | 0.00        | <b>16.67</b> | <b>16.67</b> | <b>2.22</b> | <b>11.85</b> | 0.00        | 1  |
| <i>Dichrostachys cinerea</i>       | 0.00         | 0.00         | <b>1.05</b> | <b>0.35</b>  | <b>1.01</b> | <b>1.01</b> | 0.00         | <b>0.67</b> | 0.00         | 0.00         | 0.00        | 0.00         | <b>0.01</b> | 2  |
| <i>Diospyros consolatae</i>        | <b>0.24</b>  | <b>0.24</b>  | 0.00        | <b>0.16</b>  | 0.00        | 0.00        | <b>0.24</b>  | <b>0.08</b> | 0.00         | 0.00         | 0.00        | 0.00         | <b>0.01</b> | 1  |
| <i>Diospyros kirkii</i>            | 0.00         | 0.00         | 1.05        | <b>0.35</b>  | <b>1.01</b> | <b>1.01</b> | 0.00         | <b>0.67</b> | 0.00         | 0.00         | 0.00        | 0.00         | <b>0.06</b> | 2  |
| <i>Diospyros mespiliformis</i>     | <b>2.14</b>  | <b>2.14</b>  | 0.00        | <b>1.43</b>  | 0.00        | 0.00        | <b>2.14</b>  | <b>0.71</b> | 0.00         | 0.00         | 0.00        | 0.00         | <b>0.04</b> | 9  |
| <i>Diospyros squarrosa</i>         | <b>18.53</b> | <b>18.52</b> | 0.00        | <b>12.35</b> | 0.00        | 0.00        | <b>18.51</b> | <b>6.17</b> | 0.00         | 0.00         | 0.00        | 0.00         | <b>0.01</b> | 78 |
| <i>Dobera loranthifolia</i>        | <b>0.71</b>  | <b>0.71</b>  | <b>1.05</b> | <b>0.82</b>  | <b>1.01</b> | <b>1.01</b> | <b>0.71</b>  | <b>0.91</b> | 0.00         | 0.00         | 0.00        | 0.00         | <b>0.06</b> | 5  |
| <i>Dombeya rotundifolia</i>        | <b>0.24</b>  | <b>0.24</b>  | <b>6.84</b> | <b>2.44</b>  | <b>6.53</b> | <b>6.54</b> | <b>0.24</b>  | <b>4.44</b> | 0.00         | 0.00         | 0.00        | 0.00         | <b>0.01</b> | 14 |
| <i>Drypetes natalensis</i>         | <b>1.90</b>  | <b>1.90</b>  | 0.00        | <b>1.27</b>  | 0.00        | 0.00        | <b>1.90</b>  | <b>0.63</b> | 0.00         | 0.00         | 0.00        | 0.00         | <b>0.04</b> | 8  |
| <i>Ehretia amoena</i>              | 0.00         | 0.00         | <b>1.05</b> | <b>0.35</b>  | <b>1.01</b> | <b>1.01</b> | 0.00         | <b>0.67</b> | <b>16.67</b> | <b>16.67</b> | <b>2.22</b> | <b>11.85</b> | 0.00        | 3  |
| <i>Euphorbia candelabrum</i>       | <b>0.48</b>  | <b>0.47</b>  | <b>0.53</b> | <b>0.49</b>  | <b>0.50</b> | <b>0.50</b> | <b>0.48</b>  | <b>0.49</b> | 0.00         | 0.00         | 0.00        | 0.00         | <b>0.02</b> | 3  |
| <i>Euphorbia tirucalli</i>         | 0.00         | 0.00         | <b>0.53</b> | <b>0.18</b>  | <b>0.50</b> | <b>0.50</b> | 0.00         | <b>0.33</b> | 0.00         | 0.00         | 0.00        | 0.00         | <b>0.01</b> | 1  |
| <i>Flugea virrosa</i>              | 0.00         | 0.00         | 0.00        | 0.00         | 0.00        | <b>0.00</b> | 0.00         | 0.00        | <b>16.67</b> | <b>16.67</b> | <b>2.22</b> | <b>11.85</b> | 0.00        | 1  |
| <i>Grewia bicolor</i>              | <b>1.43</b>  | <b>1.42</b>  | <b>2.63</b> | <b>1.83</b>  | <b>2.51</b> | <b>2.51</b> | <b>1.43</b>  | <b>2.15</b> | 0.00         | 0.00         | 0.00        | 0.00         | <b>0.01</b> | 11 |
| <i>Grewia goetzeana</i>            | <b>0.24</b>  | <b>0.24</b>  | 0.00        | <b>0.16</b>  | 0.00        | 0.00        | <b>0.24</b>  | <b>0.08</b> | 0.00         | 0.00         | 0.00        | 0.00         | 0.00        | 1  |
| <i>Haplocoelum foliolosum</i>      | <b>0.24</b>  | <b>0.24</b>  | 0.00        | <b>0.16</b>  | 0.00        | 0.00        | <b>0.24</b>  | <b>0.08</b> | 0.00         | 0.00         | 0.00        | 0.00         | <b>0.01</b> | 1  |
| <i>Haplocoelum inoploeum</i>       | <b>2.61</b>  | <b>2.61</b>  | 0.00        | <b>1.74</b>  | 0.00        | 0.00        | <b>2.61</b>  | <b>0.87</b> | 0.00         | 0.00         | 0.00        | 0.00         | <b>0.02</b> | 11 |
| <i>Hymenocardia ulmoides</i>       | <b>1.90</b>  | <b>1.90</b>  | 0.00        | <b>1.27</b>  | 0.00        | 0.00        | <b>1.90</b>  | <b>0.63</b> | 0.00         | 0.00         | 0.00        | 0.00         | 0.00        | 8  |
| <i>Lannea stuhlmannii</i>          | <b>1.66</b>  | <b>1.66</b>  | 0.00        | <b>1.11</b>  | 0.00        | 0.00        | <b>1.66</b>  | <b>0.55</b> | 0.00         | 0.00         | 0.00        | 0.00         | <b>0.04</b> | 7  |
| <i>Lecaniodiscus fraxinifolius</i> | <b>0.24</b>  | <b>0.24</b>  | 0.00        | <b>0.16</b>  | 0.00        | 0.00        | <b>0.24</b>  | <b>0.08</b> | 0.00         | 0.00         | 0.00        | 0.00         | 0.00        | 1  |
| <i>Manilkara discolor</i>          | <b>0.95</b>  | <b>0.95</b>  | 0.00        | <b>0.63</b>  | 0.00        | 0.00        | <b>0.95</b>  | <b>0.32</b> | 0.00         | 0.00         | 0.00        | 0.00         | <b>0.04</b> | 4  |
| <i>Manilkara mochisia</i>          | <b>6.18</b>  | <b>6.17</b>  | 0.00        | <b>4.12</b>  | 0.00        | 0.00        | <b>6.17</b>  | <b>2.06</b> | 0.00         | 0.00         | 0.00        | 0.00         | <b>0.02</b> | 26 |
| <i>Manilkara obovata</i>           | <b>1.66</b>  | <b>1.66</b>  | 0.00        | <b>1.11</b>  | 0.00        | 0.00        | <b>1.66</b>  | <b>0.55</b> | 0.00         | 0.00         | 0.00        | 0.00         | <b>0.07</b> | 7  |

Agriculture= Agriculture with scattered settlements

Table S3 (Continued)

| Species name                    | FOREST      |             |             |             | BUSHLAND    |             |             |             | AGRICULTURE  |              |             |              | BA          | N  |
|---------------------------------|-------------|-------------|-------------|-------------|-------------|-------------|-------------|-------------|--------------|--------------|-------------|--------------|-------------|----|
|                                 | Rdo         | RF          | RD          | IVI         | Rdo         | RF          | RD          | IVI         | Rdo          | RF           | RD          | IVI          |             |    |
| <i>Manilkara sansibarensis</i>  | <b>3.09</b> | <b>3.09</b> | 0.00        | <b>2.06</b> | 0.00        | 0.00        | <b>3.09</b> | <b>1.03</b> | 0.00         | 0.00         | 0.00        | 0.00         | <b>0.02</b> | 13 |
| <i>Manilkara sulcata</i>        | <b>3.33</b> | <b>3.32</b> | 0.00        | <b>2.22</b> | 0.00        | 0.00        | <b>3.33</b> | <b>1.11</b> | 0.00         | 0.00         | 0.00        | 0.00         | <b>0.04</b> | 14 |
| <i>Markhamia lutea</i>          | <b>0.95</b> | <b>0.95</b> | 0.00        | <b>0.63</b> | 0.00        | 0.00        | <b>0.95</b> | <b>0.32</b> | 0.00         | 0.00         | 0.00        | 0.00         | <b>0.01</b> | 4  |
| <i>Mimusops angustilolia</i>    | <b>0.24</b> | <b>0.24</b> | 0.00        | <b>0.16</b> | 0.00        | 0.00        | <b>0.24</b> | <b>0.08</b> | 0.00         | 0.00         | 0.00        | 0.00         | <b>0.02</b> | 1  |
| <i>Mimusops kummel</i>          | <b>1.43</b> | <b>1.42</b> | 0.00        | <b>0.95</b> | 0.00        | 0.00        | <b>1.43</b> | <b>0.48</b> | 0.00         | 0.00         | 0.00        | 0.00         | <b>0.05</b> | 6  |
| <i>Mimusops obovata</i>         | <b>0.24</b> | <b>0.24</b> | 0.00        | <b>0.16</b> | 0.00        | 0.00        | <b>0.24</b> | <b>0.08</b> | 0.00         | 0.00         | 0.00        | 0.00         | <b>0.01</b> | 1  |
| <i>Mimusops obtusifolia</i>     | <b>0.24</b> | <b>0.24</b> | 0.00        | <b>0.16</b> | 0.00        | 0.00        | <b>0.24</b> | <b>0.08</b> | 0.00         | 0.00         | 0.00        | 0.00         | <b>0.04</b> | 1  |
| <i>Mystroxydon aethiopicum</i>  | <b>2.38</b> | <b>2.37</b> | 0.00        | <b>1.58</b> | 0.00        | 0.00        | <b>2.38</b> | <b>0.79</b> | 0.00         | 0.00         | 0.00        | 0.00         | <b>0.01</b> | 10 |
| <i>Ochna schweinfurthiana</i>   | <b>0.24</b> | <b>0.24</b> | 0.00        | <b>0.16</b> | 0.00        | 0.00        | <b>0.24</b> | <b>0.08</b> | 0.00         | 0.00         | 0.00        | 0.00         | <b>0.01</b> | 1  |
| <i>Ozoroa insignis</i>          | 0.00        | 0.00        | <b>0.53</b> | <b>0.18</b> | <b>0.50</b> | <b>0.50</b> | 0.00        | <b>0.33</b> | 0.00         | 0.00         | 0.00        | 0.00         | 0.00        | 1  |
| <i>Pauridiantha paucinervis</i> | <b>0.24</b> | <b>0.24</b> | 0.00        | <b>0.16</b> | 0.00        | 0.00        | <b>0.24</b> | <b>0.08</b> | 0.00         | 0.00         | 0.00        | 0.00         | <b>0.01</b> | 1  |
| <i>Philenoptera violacea</i>    | 0.00        | 0.00        | <b>0.53</b> | <b>0.18</b> | <b>0.50</b> | <b>0.50</b> | 0.00        | <b>0.33</b> | 0.00         | 0.00         | 0.00        | 0.00         | <b>0.05</b> | 1  |
| <i>Psidium guajava</i>          | 0.00        | 0.00        | 0.00        | 0.00        | 0.00        | 0.00        | 0.00        | 0.00        | <b>16.67</b> | <b>16.67</b> | <b>2.22</b> | <b>11.85</b> | <b>0.00</b> | 1  |
| <i>Psorospermum febrifugum</i>  | <b>1.66</b> | <b>1.66</b> | 0.00        | <b>1.11</b> | 0.00        | 0.00        | 1.66        | <b>0.55</b> | 0.00         | 0.00         | 0.00        | 0.00         | <b>0.02</b> | 7  |
| <i>Pteleopsis myrtifolia</i>    | <b>0.48</b> | <b>0.47</b> | 0.00        | <b>0.32</b> | 0.00        | 0.00        | <b>0.48</b> | <b>0.16</b> | 0.00         | 0.00         | 0.00        | 0.00         | <b>0.01</b> | 2  |
| <i>Rothmannia manganjae</i>     | <b>0.24</b> | <b>0.24</b> | 0.00        | <b>0.16</b> | 0.00        | 0.00        | <b>0.24</b> | <b>0.08</b> | 0.00         | 0.00         | 0.00        | 0.00         | <b>0.01</b> | 1  |
| <i>Sclerocarya birrea</i>       | <b>0.24</b> | <b>0.24</b> | <b>2.11</b> | <b>0.86</b> | <b>2.01</b> | <b>2.01</b> | <b>0.24</b> | <b>1.42</b> | 0.00         | 0.00         | 0.00        | 0.00         | <b>0.07</b> | 5  |
| <i>Scorodophloeus fischeri</i>  | <b>1.90</b> | <b>1.90</b> | 0.00        | <b>1.27</b> | 0.00        | 0.00        | <b>1.90</b> | <b>0.63</b> | 0.00         | 0.00         | 0.00        | 0.00         | <b>0.01</b> | 8  |
| <i>Senegalia goetzei</i>        | 0.00        | 0.00        | <b>5.79</b> | <b>1.93</b> | <b>5.53</b> | <b>5.53</b> | 0.00        | <b>3.69</b> | 0.00         | 0.00         | 0.00        | 0.00         | <b>0.12</b> | 11 |
| <i>Senegalia nigrescens</i>     | 0.00        | 0.00        | <b>4.74</b> | <b>1.58</b> | <b>4.52</b> | <b>4.52</b> | 0.00        | <b>3.01</b> | 0.00         | 0.00         | 0.00        | 0.00         | <b>0.05</b> | 9  |
| <i>Senegalia polyacantha</i>    | <b>3.33</b> | <b>3.32</b> | <b>0.53</b> | <b>2.39</b> | <b>0.50</b> | <b>0.50</b> | <b>3.33</b> | <b>1.44</b> | 0.00         | 0.00         | 0.00        | 0.00         | <b>0.05</b> | 15 |
| <i>Sericanthe odoratissima</i>  | <b>0.71</b> | <b>0.71</b> | 0.00        | <b>0.47</b> | 0.00        | 0.00        | <b>0.71</b> | <b>0.24</b> | 0.00         | 0.00         | 0.00        | 0.00         | <b>0.01</b> | 3  |
| <i>Spirostachys africana</i>    | <b>5.23</b> | <b>5.22</b> | <b>1.58</b> | <b>4.01</b> | <b>1.51</b> | <b>1.51</b> | <b>5.22</b> | <b>2.75</b> | 0.00         | 0.00         | 0.00        | 0.00         | <b>0.02</b> | 25 |
| <i>Steganotaenia araliacea</i>  | 0.00        | 0.00        | <b>8.42</b> | <b>2.81</b> | <b>8.04</b> | <b>8.04</b> | 0.00        | <b>5.36</b> | 0.00         | 0.00         | 0.00        | 0.00         | <b>0.01</b> | 16 |
| <i>Sterculia appendiculata</i>  | <b>0.71</b> | 0.00        | 0.00        | <b>0.24</b> | 0.00        | 0.00        | <b>0.71</b> | <b>0.24</b> | <b>16.67</b> | <b>16.67</b> | <b>2.22</b> | <b>11.85</b> | <b>0.14</b> | 4  |
| <i>Strychnos innocua</i>        | <b>1.66</b> | <b>1.66</b> | 0.00        | <b>1.11</b> | 0.00        | 0.00        | <b>1.66</b> | <b>0.55</b> | 0.00         | 0.00         | 0.00        | 0.00         | <b>0.01</b> | 7  |
| <i>Strychnos potatorum</i>      | <b>1.66</b> | <b>1.66</b> | 0.00        | <b>1.11</b> | 0.00        | 0.00        | <b>1.66</b> | <b>0.55</b> | 0.00         | 0.00         | 0.00        | 0.00         | 0.00        | 7  |
| <i>Suregada lithoxyla</i>       | <b>0.95</b> | <b>0.95</b> | 0.00        | <b>0.63</b> | 0.00        | 0.00        | <b>0.95</b> | <b>0.32</b> | 0.00         | 0.00         | 0.00        | 0.00         | 0.00        | 4  |
| <i>Suregada zanzibariensis</i>  | <b>1.19</b> | <b>1.19</b> | 0.00        | <b>0.79</b> | 0.00        | 0.00        | <b>1.19</b> | <b>0.40</b> | 0.00         | 0.00         | 0.00        | 0.00         | <b>0.01</b> | 5  |

Agriculture= Agriculture with scattered settlements

**Table S3** (Continued)

| Species name                  | FOREST      |             |             |             | BUSHLAND    |             |             |             | AGRICULTURE |      |      |      | BA          | N  |
|-------------------------------|-------------|-------------|-------------|-------------|-------------|-------------|-------------|-------------|-------------|------|------|------|-------------|----|
|                               | Rdo         | RF          | RD          | IVI         | Rdo         | RF          | RD          | IVI         | Rdo         | RF   | RD   | IVI  |             |    |
| <i>Tamarandus indica</i>      | <b>4.51</b> | <b>4.51</b> | 0.00        | <b>3.01</b> | 0.00        | 0.00        | <b>4.51</b> | <b>1.50</b> | 0.00        | 0.00 | 0.00 | 0.00 | <b>0.25</b> | 19 |
| <i>Teclea nobilis</i>         | <b>1.19</b> | <b>1.19</b> | 0.00        | <b>0.79</b> | 0.00        | 0.00        | <b>1.19</b> | <b>0.40</b> | 0.00        | 0.00 | 0.00 | 0.00 | <b>0.01</b> | 5  |
| <i>Terminalia mollis</i>      | 0.00        | 0.00        | <b>5.79</b> | <b>1.93</b> | <b>5.53</b> | <b>5.53</b> | 0.00        | <b>3.69</b> | 0.00        | 0.00 | 0.00 | 0.00 | <b>0.03</b> | 11 |
| <i>Terminalia sericea</i>     | 0.00        | 0.00        | <b>1.58</b> | <b>0.53</b> | <b>1.51</b> | <b>1.51</b> | 0.00        | <b>1.01</b> | 0.00        | 0.00 | 0.00 | 0.00 | <b>0.01</b> | 3  |
| <i>Terminalia spinosa</i>     | <b>0.48</b> | <b>0.47</b> | 0.00        | <b>0.32</b> | 0.00        | 0.00        | <b>0.48</b> | <b>0.16</b> | 0.00        | 0.00 | 0.00 | 0.00 | <b>0.03</b> | 2  |
| <i>Turraea robusta</i>        | 0.00        | 0.00        | <b>0.53</b> | <b>0.18</b> | 0.50        | <b>0.50</b> | 0.00        | <b>0.33</b> | 0.00        | 0.00 | 0.00 | 0.00 | 0.00        | 1  |
| <i>Vachellia hockii</i>       | 0.00        | 0.00        | <b>3.68</b> | <b>1.23</b> | <b>3.52</b> | <b>3.52</b> | 0.00        | <b>2.35</b> | 0.00        | 0.00 | 0.00 | 0.00 | 0.00        | 7  |
| <i>Vachellia nilotica</i>     | 0.00        | 0.00        | <b>1.05</b> | <b>0.35</b> | <b>1.01</b> | <b>1.01</b> | 0.00        | <b>0.67</b> | 0.00        | 0.00 | 0.00 | 0.00 | <b>0.03</b> | 2  |
| <i>Vachellia robusta</i>      | <b>0.48</b> | <b>0.47</b> | 0.00        | <b>0.32</b> | 0.00        | 0.00        | <b>0.48</b> | <b>0.16</b> | 0.00        | 0.00 | 0.00 | 0.00 | <b>0.05</b> | 2  |
| <i>Vachellia xanthophloea</i> | <b>3.80</b> | <b>3.80</b> | <b>8.95</b> | <b>5.52</b> | <b>8.54</b> | <b>8.55</b> | <b>3.80</b> | <b>6.96</b> | 0.00        | 0.00 | 0.00 | 0.00 | 0.00        | 33 |
| <i>Vepris lanceolata</i>      | <b>0.24</b> | <b>0.24</b> | 0.00        | <b>0.16</b> | 0.00        | 0.00        | <b>0.24</b> | <b>0.08</b> | 0.00        | 0.00 | 0.00 | 0.00 | <b>0.03</b> | 1  |
| <i>Vepris simplicifolia</i>   | <b>0.24</b> | <b>0.24</b> | 0.00        | <b>0.16</b> | 0.00        | 0.00        | <b>0.24</b> | <b>0.08</b> | 0.00        | 0.00 | 0.00 | 0.00 | <b>0.01</b> | 1  |
| <i>Ximenia caffra</i>         | 0.00        | 0.00        | <b>0.53</b> | <b>0.18</b> | <b>0.50</b> | <b>0.50</b> | 0.00        | <b>0.33</b> | 0.00        | 0.00 | 0.00 | 0.00 | 0.00        | 1  |

Agriculture= Agriculture with scattered settlements
